# Supplementary material
Source: publisher figshare collection journal article supplement (https://karger.figshare.com/articles/dataset/_/7969502)
Supplement: Supplementary file 1 [file 1]

### Appendix 3: miRNAs whose expression is correlated to histamine release

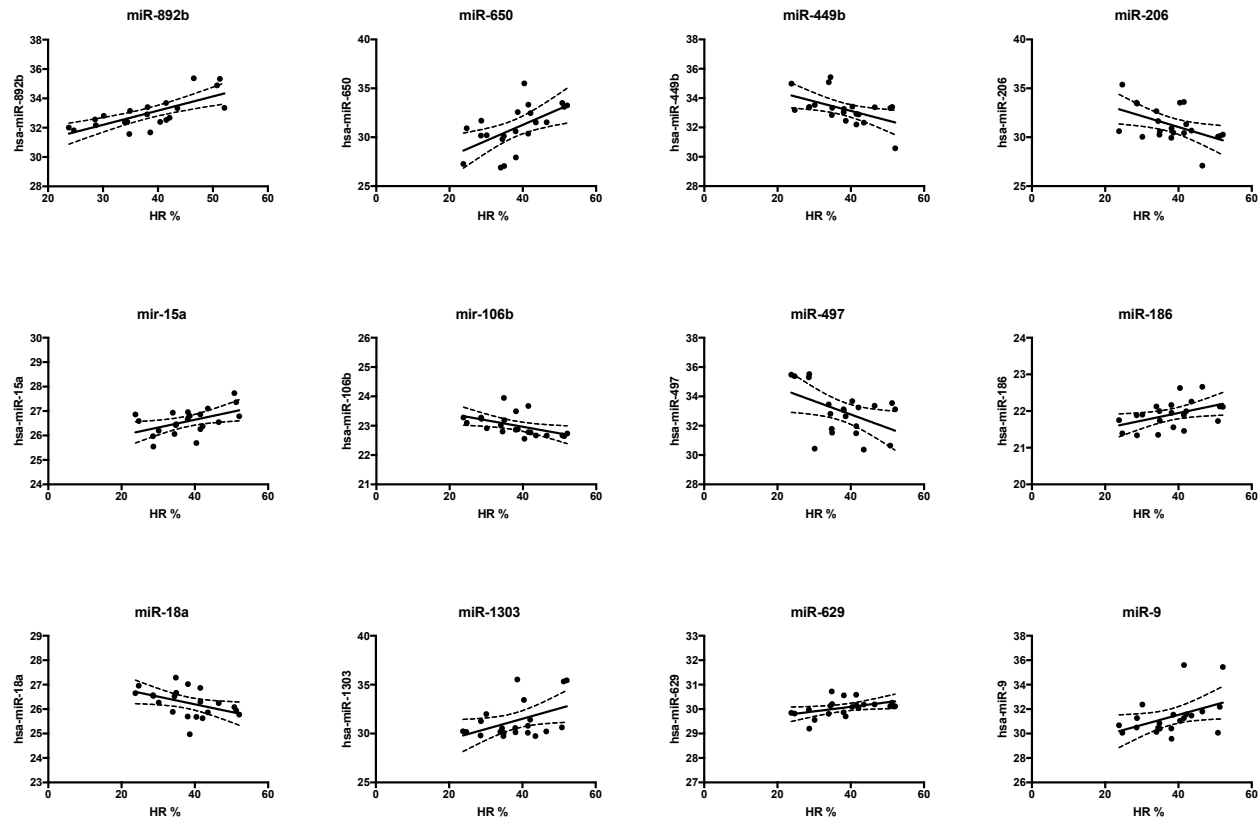

The expression of 12 miRNAs were significantly correlated to histamine release when including data from both AMCs and HMCs (pearson correlation and corresponding p-value < 0.05). Higher expression levels of miR-892bm miR-650, miR-15a, miR-186, miR-1303, miR-629 and miR-9 correlated with lower HR, while lower expression of miR-449b, miR-206, miR-106b, miR-497 and miR-18a correlated with higher HR. The Pearson and Spearman correlation were calculated along with the corresponding two-tailed p-values. A correlation line was fitted using linear regression and includes 95% confidence bands
