# Supplementary material
Source: publisher figshare collection journal article supplement (https://karger.figshare.com/articles/dataset/_/7969502)
Supplement: Supplementary file 2 [file 1]

## Appendix 2: Differentially expressed miRNAs in HMCs and AMCs during sensitization and activation

| HMC        |       |                |                   |                                             |                              |
|------------|-------|----------------|-------------------|---------------------------------------------|------------------------------|
|            | Mean  | Std. Deviation | $\Delta\Delta Ct$ | p-value (paired t-test compared to resting) | p-value, limma (BH adjusted) |
| miR-210    |       |                |                   |                                             |                              |
| Resting    | 7.818 | 2.556          |                   |                                             |                              |
| Sensitized | 4.68  | 0.6745         | -3.138            | 0.0004                                      | 0.000650668                  |
| Activated  | 4.906 | 0.7005         | -2.912            | 0.0009                                      | 7.07E-04                     |
| miR-132    |       |                |                   |                                             |                              |
| Resting    | 5.664 | 0.5883         |                   |                                             |                              |
| Sensitized | 5.747 | 0.7184         | -0.083            | 0.5292                                      |                              |
| Activated  | 4.622 | 0.3483         | -1.042            | 0.0009                                      | 5.41E-04                     |
| miR-212    |       |                |                   |                                             |                              |
| Resting    | 9.222 | 0.6176         |                   |                                             |                              |
| Sensitized | 9.181 | 0.556          | -0.041            | 0.6825                                      |                              |
| Activated  | 7.742 | 0.4554         | -1.48             | 0.0003                                      | 1.70E-06                     |
| AMC        |       |                |                   |                                             |                              |
|            | Mean  | Std. Deviation | $\Delta\Delta Ct$ | p-value (paired t-test compared to resting) | p-value, limma (BH adjusted) |
| miR-210    |       |                |                   |                                             |                              |
| Resting    | 7.975 | 2.451          |                   |                                             |                              |
| Sensitized | 4.506 | 0.5684         | -3.469            | 0.0004                                      | 0.000212226                  |
| Activated  | 4.72  | 0.392          | -3.255            | 0.0014                                      | 0.000656335                  |
| miR-132    |       |                |                   |                                             |                              |
| Resting    | 5.551 | 0.4197         |                   |                                             |                              |
| Sensitized | 5.307 | 0.3872         | -0.244            | 0.0916                                      |                              |
| Activated  | 4.479 | 0.3781         | -1.072            | 0.0002                                      | 0.000766235                  |
| miR-212    |       |                |                   |                                             |                              |
| Resting    | 8.898 | 0.4815         |                   |                                             |                              |
| Sensitized | 8.926 | 0.5801         | -0.028            | 0.7855                                      |                              |
| Activated  | 7.728 | 0.4654         | -1.17             | 0.0001                                      | 0.000656335                  |

Differentially expressed miRNAs in HMCs and AMCs during sensitization and activation. A summary of the expression and statistics of miR-210, miR-132 and miR-212.
