# Supplementary material
Source: publisher figshare collection journal article supplement (https://karger.figshare.com/articles/dataset/_/7969502)

Appendix 4: Target prediction and functional enrichment analysis of miRNAs correlated to histamine release

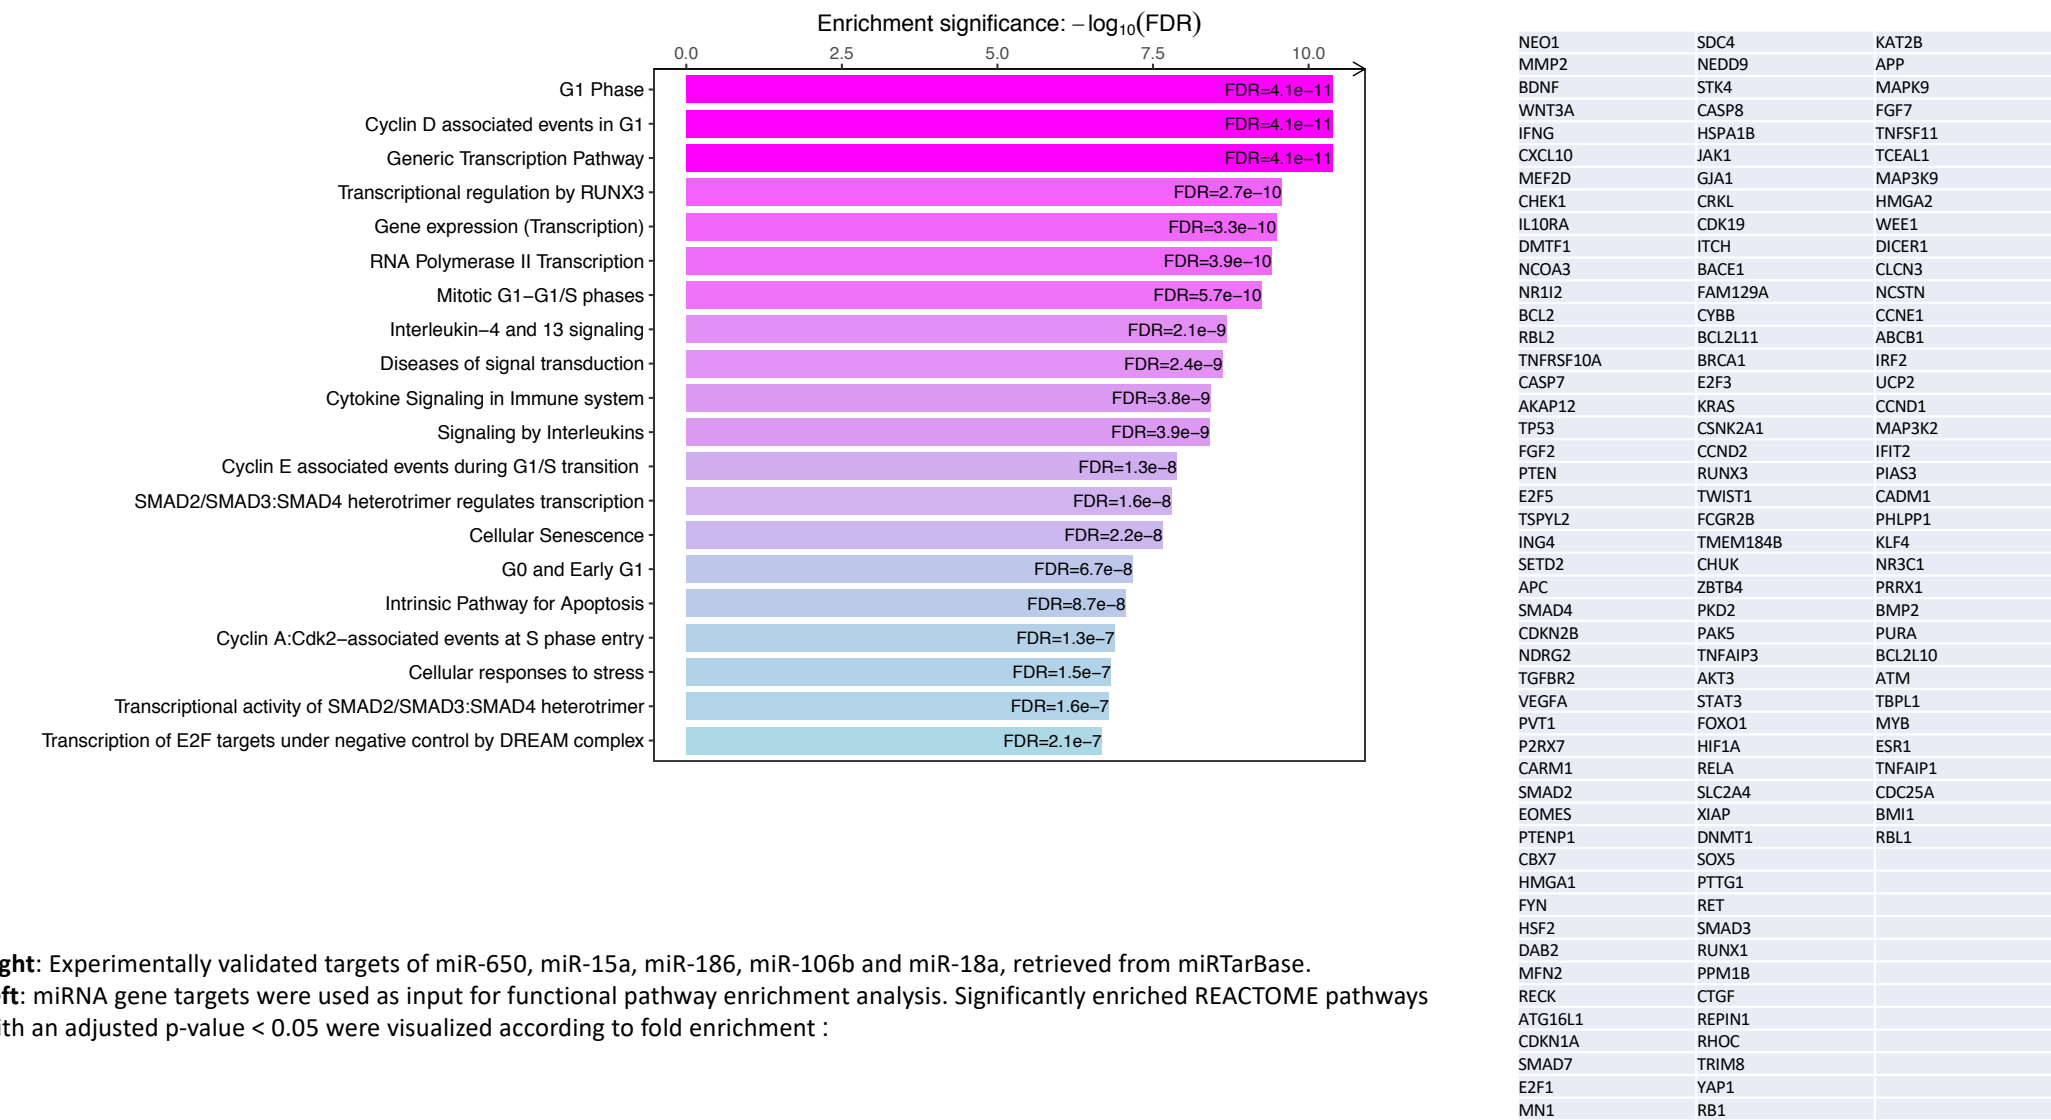

Supplement: Supplementary file 3 [file 1]
