# Supplementary material
Source: publisher figshare collection journal article supplement (https://karger.figshare.com/articles/dataset/_/7969502)
Supplement: Supplementary file 4 [file 1]

## Appendix 1: Patient characteristics

| Patient Nr | MC line | Sex | Age | GINA Score | Sensitisations by s-IgE or SPT        |
|------------|---------|-----|-----|------------|---------------------------------------|
| 1          | 3711A   | f   | 45  | Not known  | Not known                             |
| 2          | 3711B   | m   | 39  | 2          | g6, t3, e1, e5                        |
| 3          | 3711C   | m   | 53  | 2          | g6, w6, t3, e5, e1, d2, d1,           |
| 4          | 3711D   | m   | 21  | 2          | g6, t3, e5, d2, d1, A Siro, T putres. |
| 5          | 3711E   | m   | 48  | 4          | g6, w6, t3, e5, e1                    |
| 6          | 3711F   | f   | 40  | 3          | spt pos g6, t3 and e5                 |
| 7          | 4011A   | m   | 25  | 3          | g6, e5, e1, d2, d1                    |
| 8          | 4011B   | f   | 26  | 1          | t3, e4                                |
| 9          | 4011C   | f   | 45  | 2          | t3, e1 e5                             |
| 10         | 4011D   | m   | 49  | 2          | e5, e6                                |

MC Line refers to the line cultured from each individual patient. GINA Score was assigned retrospectively on the basis of the patients journal entries. Sensitisations are elisted as Thermo-Fisher allergen extract codes.
