# Supplementary material
Source: publisher figshare collection journal article supplement (https://karger.figshare.com/articles/dataset/_/7969502)
Supplement: Supplementary file 5 [file 1]

Appendix 6: Target prediction and functional enrichment analysis of miRNAs correlated to PGD2 synthesis

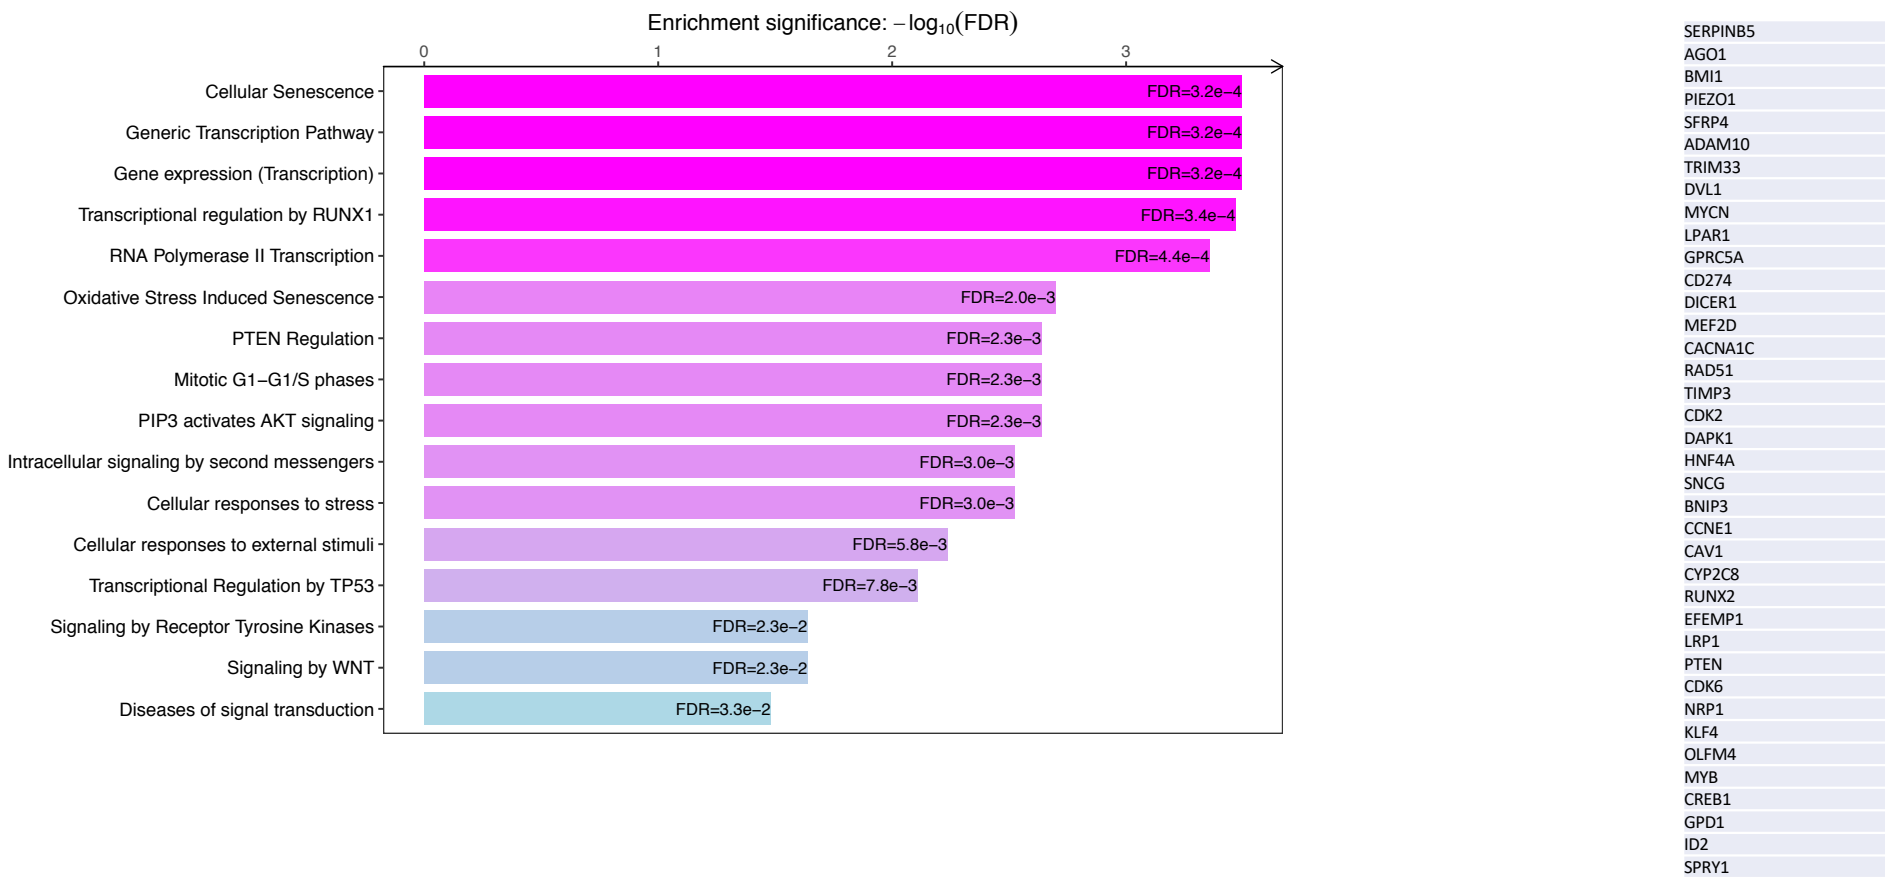

**Right:** Experimentally validated targets of miR- 103, miR-338-5p and miR-629, retrieved from miRTarBase.

**Left:** miRNA gene targets were used as input for functional pathway enrichment analysis. Significantly enriched REACTOME pathways with an adjusted p-value < 0.05 were visualized according to fold enrichment.
