# Supplementary material
Source: publisher figshare collection journal article supplement (https://karger.figshare.com/articles/dataset/_/7969502)
Supplement: Supplementary file 6 [file 1]

Archive with 7 entries (7 files):
- Appendix-Appendix_1.pdf
- Appendix-Appendix_2.pdf
- Appendix-Appendix_3.pdf
- Appendix-Appendix_4.pdf
- Appendix-Appendix_5.pdf
- Appendix-Appendix_6.pdf
- Supplementary material-20181123_Sup_material_and_methods_JJ.docx
