# Supplementary material
Source: publisher figshare collection journal article supplement (https://karger.figshare.com/articles/dataset/_/7969502)
Supplement: Supplementary file 6 [file 1 › Appendix-Appendix_5.pdf]

## Appendix 5: miRNAs, whose expression is correlated to PGD2 synthesis

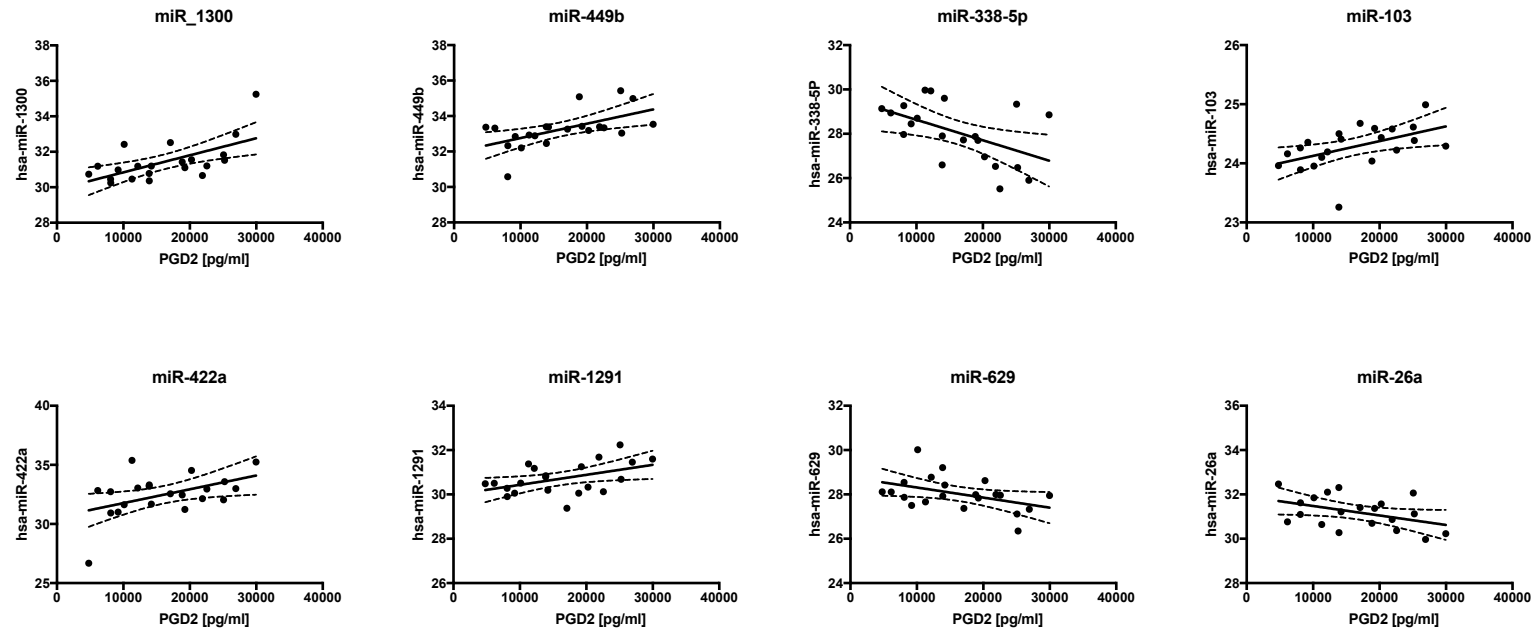

Three miRNAs were significantly correlated to PGD2 synthesis (pearson correlation and corresponding p-value < 0.05). Higher expression level of miR-1300, miR-449b, miR- 103, miR- 422a, miR-1291 correlated with lower PGD2 levels, while increased expression of miR-338-5p, miR-629 and miR-26a correlated with higher levels of PGD2. The Pearson and Spearman correlation were calculated along with the corresponding two-tailed p-values. A correlation line was fitted using linear regression and includes 95% confidence bands
